# Supplementary material for: Contribution of the Skin–Gut Axis to Immune-Related Adverse Events with Multi-System Involvement
Source: MDPI journal article supplement (doi:10.3390/cancers14122995), 2022-06-17
Supplement: s1 [file s1]

# Supplementary Material: Contribution of the Skin–Gut Axis to Immune-Related Adverse Events with Multi-System Involvement

Alyce M. Kuo, Lukas Kraehenbuehl, Stephanie King, Donald Y.M. Leung, Elena Goleva, Andrea P. Moy, Mario E. Lacouture, Neil J. Shah and David M. Faleck

**Table S1.** Search strategy Cohort 1.

| DataLine Search Criteria for Cohort 1                                                                                                                                                                                                                                                                                                                                                                                                                                                                                                                                        |
|------------------------------------------------------------------------------------------------------------------------------------------------------------------------------------------------------------------------------------------------------------------------------------------------------------------------------------------------------------------------------------------------------------------------------------------------------------------------------------------------------------------------------------------------------------------------------|
| L12.0 - BULLOUS PEMPHIGOID<br>L13.9 - BULLOUS DISORDER, UNSPECIFIED<br>L20.9 - ATOPIC DERMATITIS, UNSPECIFIED<br>L27.0 - Generalized skin eruption due to drugs and medicaments taken internally<br>L29.9 - PRURITUS, UNSPECIFIED<br>L50.8 - Other urticaria<br>L50.9 - URTICARIA, UNSPECIFIED<br>L80 - Vitiligo<br>L81.6 - Other disorders of diminished melanin formation<br>L81.8 - Other specified disorders of pigmentation<br>L81.9 - DISORDER OF PIGMENTATION, UNSPECIFIED                                                                                            |
| Criteria                                                                                                                                                                                                                                                                                                                                                                                                                                                                                                                                                                     |
| 1) Patients who have had any of the following ICD-10 codes, effective the last 3 years:<br>L12.0 - BULLOUS PEMPHIGOID<br>L13.9 - BULLOUS DISORDER, UNSPECIFIED<br>L20.9 - ATOPIC DERMATITIS, UNSPECIFIED<br>L27.0 - Generalized skin eruption due to drugs and medicaments taken internally<br>L29.9 - PRURITUS, UNSPECIFIED<br>L50.8 - Other urticaria<br>L50.9 - URTICARIA, UNSPECIFIED<br>L80 - Vitiligo<br>L81.6 - Other disorders of diminished melanin formation<br>L81.8 - Other specified disorders of pigmentation<br>L81.9 - DISORDER OF PIGMENTATION, UNSPECIFIED |
| OR Patients with a ClinDoc in the last 3 years with the term 'rash'                                                                                                                                                                                                                                                                                                                                                                                                                                                                                                          |
| 2) The patients were treated with immunotherapy in the 3 months before criteria 1.: include patients on active ICB between 09/28/2017 and 09/28/2020<br>Use DataLine list or include the following:<br>CEMIPLIMAB<br>DURVALUMAB<br>IPILIMUMAB<br>ATEZOLIZUMAB<br>AVELUMAB<br>NIVOLUMAB<br>CEMIPLIMAB<br>PEMBROLIZUMAB<br>NIVOLUMAB<br>AVELUMAB<br>ATEZOLIZUMAB<br>PEMBROLIZUMAB<br>DURVALUMAB<br>MEDI0680 (AMP-514)<br>NIVOLUMAB<br>IPILIMUMAB<br>PDR001<br>SPARTALIZUMAB                                                                                                    |
| 3) The patients have not had a liquid primary tumor diagnosis:<br>SEER Category1 in ('Lymphoma','Myeloma','Leukemia')                                                                                                                                                                                                                                                                                                                                                                                                                                                        |

**Table S2.** Sub-cohort analysis by cancer type.

| Cohort 1               |                           |     |                     |     |                       |      |                        |     |                  |
|------------------------|---------------------------|-----|---------------------|-----|-----------------------|------|------------------------|-----|------------------|
| Variable               | Melanoma ( <i>n</i> = 25) |     | GU ( <i>n</i> = 47) |     | Lung ( <i>n</i> =30)  |      | Other ( <i>n</i> = 50) |     | <i>p</i> -value  |
|                        | <i>n</i>                  | %   | <i>n</i>            | %   | <i>n</i>              | %    | <i>n</i>               | %   |                  |
| ircAE Only             | 21                        | 84% | 36                  | 77% | 24                    | 80%  | 45                     | 90% | <i>P</i> = 0.348 |
| ircAE + irColitis      | 4                         | 16% | 11                  | 23% | 6                     | 20%  | 5                      | 10% |                  |
| ircAE before irColitis | 3                         | 75% | 9                   | 82% | 3                     | 50%  | 3                      | 60% | <i>P</i> = 0.547 |
| irColitis before ircAE | 1                         | 25% | 2                   | 18% | 3                     | 50%  | 2                      | 40% |                  |
| Cohort 2               |                           |     |                     |     |                       |      |                        |     |                  |
| Variable               | Melanoma ( <i>n</i> = 76) |     | GU ( <i>n</i> = 39) |     | Lung ( <i>n</i> = 46) |      | Other ( <i>n</i> = 85) |     | <i>p</i> -value  |
|                        | <i>n</i>                  | %   | <i>n</i>            | %   | <i>n</i>              | %    | <i>n</i>               | %   |                  |
| Colitis Only           | 66                        | 87% | 28                  | 72% | 44                    | 96%  | 73                     | 86% | <i>P</i> = 0.019 |
| ircAE + irColitis      | 10                        | 13% | 11                  | 28% | 2                     | 4%   | 12                     | 14% |                  |
| ircAE before irColitis | 6                         | 60% | 8                   | 73% | 2                     | 100% | 10                     | 83% | <i>P</i> = 0.515 |
| irColitis before ircAE | 4                         | 40% | 3                   | 27% | 0                     | 0%   | 2                      | 17% |                  |

GU= genitourinary, ircAE=immune-related cutaneous adverse event, irColitis=immune-related colitis.
